# Supplementary material for: Gut Microbiota Markers and Dietary Habits Associated with Extreme Longevity in Healthy Sardinian Centenarians
Source: MDPI journal article supplement (doi:10.3390/nu14122436), 2022-06-12
Supplement: s1 [file s1]

## **Gut microbiota markers and dietary habits associated with extreme longevity in healthy Sardinian centenarians**

Vanessa Palmas<sup>1</sup>, Silvia Pisanu<sup>1</sup>, Veronica Madau<sup>1</sup>, Emanuela Casula<sup>1</sup>, Andrea Deledda<sup>2</sup>, Roberto Cusano<sup>3</sup>, Paolo Uva<sup>4</sup>, Andrea Loviselli<sup>2</sup>, Fernanda Velluzzi<sup>2°</sup>, Aldo Manzin<sup>1°\*</sup>

<sup>1</sup>Department of Biomedical Sciences, University of Cagliari, Cagliari, Italy

<sup>2</sup>Department of Medical Sciences and Public Health, University of Cagliari, Cagliari, Italy

<sup>3</sup>CRS4, Science and Technology Park Polaris, Piscina Manna, Pula, Cagliari, Italy

<sup>4</sup>IRCCS Istituto Giannina Gaslini, Genoa, Italy

<sup>°</sup>These authors contributed equally to the work

\* Correspondence to: Prof. Aldo Manzin, Department of Biomedical Sciences, University of Cagliari, Microbiology and Virology Unit, Azienda Ospedaliero-Universitaria Cagliari, Strada Statale 554-bivio Sestu, I-09042 Monserrato, Cagliari (e-mail: aldo.manzin@gmail.com).

## **Materials and Methods**

### **Anthropometric evaluation**

The anthropometric evaluation included measurements of height (cm) and weight (kg), used for the Body Mass Index (BMI) calculation ( $\text{kg/m}^2$ ). BMI was calculated by the ratio of weight in kilograms and height in meters squared: normal range (normal-weight condition) was considered 18.5-24.99  $\text{kg/m}^2$ , the range for overweight was 25-29.99  $\text{kg/m}^2$ , for obesity class I was 30-34.99  $\text{kg/m}^2$ , for obesity class II was 35-39.99  $\text{kg/m}^2$  and for obesity class III greater than or equal to 40  $\text{kg/m}^2$ .

### **Lifestyle factors assessment**

The MDS score, including 11 food groups, assigns an increasing score from 0 to 5, based on the monthly or weekly consumption of foods typical of the Mediterranean diet (unrefined cereals, potatoes, vegetables, fruit, legumes, fish and olive oil) and a decreasing score from 5 to 0, based on the monthly consumption of foods not included in the same dietary model (meat or derivatives, poultry, whole dairy products); for alcohol consumption, decreasing scores from 5 to 1 correspond respectively to a consumption <300 ml/day, <400 ml/day, <500 ml/day, <600 ml/day, while a score of 0 corresponds to a consumption > 700 ml/d or no consumption. The total score, obtained from the sum of the 11 individual scores (one for each food group), ranges from 0 to 55, where higher values indicate greater adherence to MD [1].

State of cognition was assessed through the MMSE questionnaire. The score ranges from 0 to 30, with higher scores corresponding to better cognitive functioning [2]. However, in the assessment of the elderly population, the score must be appropriate to the age group and level of education [3].

The ability of each subject to carry out the daily life activities independently was measured through the ADL questionnaire. If the person is unable to carry out any activity, he/she is considered functionally incapable (ADL dependent) [4].

Nutritional status in older people was measured using the MNA questionnaire. It is an 18-item questionnaire that consists of a two-step procedure: the MNA-SF (6 elements) to screening malnutrition and its risk and the complete MNA to assess nutritional status. The questionnaire includes anthropometric measurements combined with information on diet, lifestyle, medications, the presence of acute stress, dementia or depression and a self-perception of health and nutrition. It correlates with clinical indicators of nutritional status (albumin level, BMI, energy intake and vitamin status). A score  $\geq 24$  corresponds to a normal nutritional status, a score  $\leq 17$  identifies malnourished subjects, while subjects with a score between 17 and 23.5 are at risk of malnutrition [5,6].

The level of daily physical activity in the elderly was assessed through the PASE questionnaire. It consists of 12 elements that evaluate the duration, frequency, extent of exertion and the amount of physical activity performed over a seven-day period by individuals aged 65 and over. In particular, the questionnaire evaluates the activities typically chosen by the elderly, such as walking, recreational activities, exercise, housework, gardening and caring for others. The score (from 0 to 793) is calculated based on the frequency, duration and level of intensity of the activity compared to that of the previous week; higher scores indicate greater physical activity [7].

**Table S1** Alpha diversity analysis between CENT, NON and CTLs and between CPAR and COFF

| Shannon index | Mean (SD)   | overall <i>p</i> | Bonferroni <i>p</i> (CENT vs NON) |
|---------------|-------------|------------------|-----------------------------------|
|               |             | <b>0.037</b>     | <b>0.020</b>                      |
| CENT          | 2.39 (0.31) | 0.398            |                                   |
| NON           | 2.46 (0.29) |                  |                                   |
| CTLs          | 2.32 (0.2)  |                  |                                   |
| CPAR          | 2.40 (0.29) |                  |                                   |
| COFF          | 2.29 (0.19) |                  |                                   |

Differences in the Shannon index between CENT, NON and CTLs, evaluated by Kruskal-Wallis test in SPSS software v.28.0.1.0 followed by Bonferroni correction for multiple comparisons. CENT= centenarian subjects, NON= nonagenarian subjects, CTLs= healthy younger controls. CPAR=centenarian parents, COFF=centenarians' offspring. Bold values denote statistical significance ( $p \leq 0.05$ ).

**Table S2** GM beta diversity analysis between CENT, NON and CTLs

| Beta diversity     | overall <i>p</i> | PERMANOVA pairwise <i>p</i> (CENT vs CTLs) | PERMANOVA pairwise <i>p</i> (NON vs CTLs) | PERMANOVA pairwise <i>p</i> (CENT vs NON) |
|--------------------|------------------|--------------------------------------------|-------------------------------------------|-------------------------------------------|
|                    | <b>0.001</b>     | <b>0.006</b>                               | <b>0.003</b>                              | n.s.                                      |
| CENT               |                  |                                            |                                           |                                           |
| NON                |                  |                                            |                                           |                                           |
| CTLs               |                  |                                            |                                           |                                           |
| Degrees of freedom | 2                |                                            |                                           |                                           |
| Sum of squares     | 1.498            |                                            |                                           |                                           |
| Mean of squares    | 0.749            |                                            |                                           |                                           |
| F                  | 6.074            |                                            |                                           |                                           |
| R <sup>2</sup>     | 0.1201           |                                            |                                           |                                           |

Differences in the beta diversity index between CENT, NON and CTLs were evaluated by Permutational Multivariate Analysis of Variance (PERMANOVA) performed in R (RVAdeMemoire package). CENT= centenarian subjects, NON= nonagenarian subjects, CTLs= healthy younger controls. Bold values denote statistical significance ( $p \leq 0.05$ ); n.s.= not significant. Pairwise PERMANOVA test confirmed significant segregation in the comparison between LLS groups and CTLs.

**Table S3** GM beta diversity analysis between CPAR and COFF

| Beta diversity     | PERMANOVA pairwise <i>p</i> |
|--------------------|-----------------------------|
| CPAR               | 1                           |
| COFF               |                             |
| Degrees of freedom | 1                           |
| Sum of squares     | 0.08                        |
| Mean of squares    | 0.08                        |
| F                  | 0.706                       |
| R <sup>2</sup>     | 0.056                       |

Differences in the beta diversity index between CPAR and COFF were evaluated by Pairwise Permutational Multivariate Analysis of Variance (Pairwise PERMANOVA) performed in R (RVAdMemoire package). CPAR=centenarian parents, COFF=centenarians' offspring. Bold values denote statistical significance ( $p \leq 0.05$ ).

**Table S4** 29 Statistically significant common differences in the relative abundance of bacterial taxa in the two classes of LLS compared to CTLs

| Phylum         | Family             | Genus                  | Species                 | Kruskal-Wallis <i>p</i> -value | Post-hoc analysis, Bonferroni method<br>(only for significant bacteria) |                          |                         |     | Mean±SD<br>CENT | Mean±SD<br>NON | Mean±SD<br>CTLs |
|----------------|--------------------|------------------------|-------------------------|--------------------------------|-------------------------------------------------------------------------|--------------------------|-------------------------|-----|-----------------|----------------|-----------------|
|                |                    |                        |                         |                                | Pairwise group                                                          | Pairwise <i>p</i> -value | Chi square ( $\chi^2$ ) | ↓/↑ |                 |                |                 |
| Actinobacteria |                    |                        |                         | 0.0018                         | CENT- CTLs                                                              | 0.0393                   | 12.66                   | ↑   | 8.04±10.23      | 9.12±9.91      | 3.09±3.61       |
|                |                    |                        |                         |                                | NON- CTLs                                                               | 0.0039                   |                         | ↑   |                 |                |                 |
| Actinobacteria | Coriobacteriaceae  |                        |                         | 0.0003                         | CENT- CTLs                                                              | 0.0445                   | 16.16                   | ↑   | 1.10±1.13       | 1.17±1.41      | 0.56±0.87       |
|                |                    |                        |                         |                                | NON- CTLs                                                               | 0.0004                   |                         | ↑   |                 |                |                 |
| Actinobacteria | Coriobacteriaceae  | <i>Collinsella</i>     |                         | 0.0022                         | NON- CTLs                                                               | 0                        | 12.26                   | ↑   | 0.66±0.73       | 0.77±1.28      | 0.00±0.00       |
|                |                    |                        |                         |                                | CENT- CTLs                                                              | 0                        |                         | ↑   |                 |                |                 |
| Actinobacteria | Coriobacteriaceae  | <i>Eggerthella</i>     |                         | 0.0075                         | CENT- CTLs                                                              | 0.0275                   | 9.79                    | ↑   | 0.10±0.22       | 0.05±0.05      | 0.03±0.05       |
|                |                    |                        |                         |                                | NON- CTLs                                                               | 0.0394                   |                         | ↑   |                 |                |                 |
| Actinobacteria | Bifidobacteriaceae | <i>Bifodobacterium</i> | <i>B. asteroides</i>    | 0.0006                         | CENT- CTLs                                                              | 0.0294                   | 14.95                   | ↑   | 0.11±0.18       | 0.11±0.14      | 0.02±0.03       |
|                |                    |                        |                         |                                | NON- CTLs                                                               | 0.0011                   |                         | ↑   |                 |                |                 |
| Actinobacteria | Coriobacteriaceae  | <i>Collinsella</i>     | <i>C. intestinalis</i>  | 0.0048                         | CENT- CTLs                                                              | 0.0295                   | 10.66                   | ↑   | 0.13±0.22       | 0.06±0.06      | 0.09±0.33       |
|                |                    |                        |                         |                                | NON- CTLs                                                               | 0.0192                   |                         | ↓   |                 |                |                 |
| Bacteroidetes  |                    |                        |                         | 0.0002                         | CENT- CTLs                                                              | 0.0032                   | 16.95                   | ↓   | 24.74±24.26     | 25.28±17.60    | 43.59±21.64     |
|                |                    |                        |                         |                                | NON- CTLs                                                               | 0.0019                   |                         | ↓   |                 |                |                 |
| Bacteroidetes  | Bacteroidaceae     |                        |                         | 0.0007                         | CENT- CTLs                                                              | 0.0085                   | 14.54                   | ↓   | 15.77±17.53     | 15.03±12.52    | 28.05±18.05     |
|                |                    |                        |                         |                                | NON- CTLs                                                               | 0.004                    |                         | ↓   |                 |                |                 |
| Bacteroidetes  | Bacteroidaceae     | <i>Bacteroides</i>     |                         | 0.0007                         | CENT- CTLs                                                              | 0.0085                   | 14.54                   | ↓   | 15.77±17.53     | 15.03±12.52    | 28.05±18.05     |
|                |                    |                        |                         |                                | NON- CTLs                                                               | 0.004                    |                         | ↓   |                 |                |                 |
| Bacteroidetes  | Bacteroidaceae     | <i>Bacteroides</i>     | <i>B. rodentium</i>     | 0.0002                         | CENT- CTLs                                                              | 0.0446                   | 17.37                   | ↓   | 1.82±2.47       | 0.95±1.11      | 2.65±2.36       |
|                |                    |                        |                         |                                | NON- CTLs                                                               | 0.0002                   |                         | ↓   |                 |                |                 |
| Bacteroidetes  | Bacteroidaceae     | <i>Bacteroides</i>     | <i>B. sartorii</i>      | 0.0002                         | CENT- CTLs                                                              | 0.0006                   | 17.30                   | ↓   | 0.22±0.60       | 0.12±0.10      | 0.25±0.20       |
|                |                    |                        |                         |                                | NON- CTLs                                                               | 0.0102                   |                         | ↓   |                 |                |                 |
| Bacteroidetes  | Bacteroidaceae     | <i>Bacteroides</i>     | <i>B. xylanisolvens</i> | 0.0005                         | CENT- CTLs                                                              | 0.0017                   | 15.19                   | ↓   | 0.50±0.47       | 0.74±0.82      | 1.74±2.57       |
|                |                    |                        |                         |                                | NON- CTLs                                                               | 0.014                    |                         | ↓   |                 |                |                 |
| Cyanobacteria  |                    | <i>Dolichospermum</i>  |                         | 0.0019                         | CENT- CTLs                                                              | 0.0045                   | 12.57                   | ↓   | 0.00±0.00       | 0.01±0.01      | 0.34±1.30       |
|                | Aphanizomenonaceae |                        |                         |                                | NON- CTLs                                                               | 0.0348                   |                         | ↓   |                 |                |                 |
| Cyanobacteria  |                    | <i>Dolichospermum</i>  | <i>D. macrosporum</i>   | 0                              | CENT- CTLs                                                              | 0.0005                   | 26.32                   | ↓   | 0.00±0.00       | 0.00±0.00      | 0.34±1.30       |
|                | Aphanizomenonaceae |                        |                         |                                | NON- CTLs                                                               | 0                        |                         | ↓   |                 |                |                 |

|                   |                                       |                           |                           |        |            |        |       |   |           |           |           |
|-------------------|---------------------------------------|---------------------------|---------------------------|--------|------------|--------|-------|---|-----------|-----------|-----------|
| Euryarchaeota     |                                       |                           |                           | 0      | CENT- CTLs | 0      | 19.43 | ↑ | 0.29±0.65 | 0.12±0.36 | 0.00±0.00 |
|                   |                                       |                           |                           |        | NON- CTLs  | 0.0131 |       | ↑ |           |           |           |
| Euryarchaeota     | Methanobacteriaceae                   |                           |                           | 0      | CENT- CTLs | 0      | 40.68 | ↑ | 0.29±0.65 | 0.12±0.36 | 0.03±0.20 |
|                   |                                       |                           |                           |        | NON- CTLs  | 0.013  |       | ↑ |           |           |           |
| Euryarchaeota     | Methanobacteriaceae                   | <i>Methanobrevibacter</i> | <i>M. smithii</i>         | 0      | CENT- CTLs | 0      | 25.27 | ↑ | 0.28±0.61 | 0.11±0.34 | 0.04±0.19 |
|                   |                                       |                           |                           |        | NON- CTLs  | 0.0116 |       | ↑ |           |           |           |
| Euryarchaeota     | Methanobacteriaceae                   | <i>Methanobrevibacter</i> |                           | 0      | CENT- CTLs | 0      | 24.45 | ↑ | 0.29±0.65 | 0.12±0.36 | 0.04±0.20 |
|                   |                                       |                           |                           |        | NON- CTLs  | 0.0189 |       | ↑ |           |           |           |
| Firmicutes        | Thermicaceae                          |                           |                           | 0.0051 | CENT- CTLs | 0.0244 | 10.55 | ↑ | 0.11±0.21 | 0.14±0.23 | 0.03±0.06 |
|                   |                                       |                           |                           |        | NON- CTLs  | 0.0251 |       | ↑ |           |           |           |
| Firmicutes        | Lachnospiraceae                       | <i>Butyrivibrio</i>       |                           | 0.0016 | CENT- CTLs | 0.0038 | 12.93 | ↓ | 0.02±0.02 | 0.02±0.03 | 0.12±0.34 |
|                   |                                       |                           |                           |        | NON- CTLs  | 0.0318 |       | ↓ |           |           |           |
| Firmicutes        | Bacillales_Family<br>X_Incertae Sedis | <i>Thermicanus</i>        |                           | 0.0051 | CENT- CTLs | 0.0244 | 10.55 | ↑ | 0.11±0.21 | 0.14±0.23 | 0.03±0.06 |
|                   |                                       |                           |                           |        | NON- CTLs  | 0.0251 |       | ↑ |           |           |           |
| <i>Firmicutes</i> | <i>Lachnospiraceae</i>                | <i>Butyrivibrio</i>       | <i>B. proteoclasticus</i> | 0.0016 | CENT- CTLs | 0.0039 | 12.89 | ↓ | 0.02±0.02 | 0.02±0.03 | 0.12±0.34 |
|                   |                                       |                           |                           |        | NON- CTLs  | 0.0327 |       | ↓ |           |           |           |
| Firmicutes        | Lactobacillaceae                      | <i>Lactobacillus</i>      | <i>L. taiwanensis</i>     | 0.0001 | CENT- CTLs | 0.0313 | 18.86 | ↑ | 0.02±0.05 | 0.16±0.84 | 0.00±0.00 |
|                   |                                       |                           |                           |        | NON- CTLs  | 0.0001 |       | ↑ |           |           |           |
| Proteobacteria    | Alcaligenaceae                        |                           |                           | 0.0003 | CENT- CTLs | 0.0065 | 16.38 | ↓ | 0.46±1.31 | 0.46±1.43 | 0.83±0.86 |
|                   |                                       |                           |                           |        | NON- CTLs  | 0.0014 |       | ↓ |           |           |           |
| Proteobacteria    | Xanthomonadaceae                      |                           |                           | 0      | CENT- CTLs | 0.0015 | 45.43 | ↑ | 0.13±0.15 | 0.09±0.11 | 0.01±0.03 |
|                   |                                       |                           |                           |        | NON- CTLs  | 0.0021 |       | ↑ |           |           |           |
| Proteobacteria    | Oxalobacteraceae                      | <i>Collimonas</i>         |                           | 0      | CENT- CTLs | 0      | 61.68 | ↓ | 0.00±0.00 | 0.00±0.00 | 0.32±0.54 |
|                   |                                       |                           |                           |        | NON- CTLs  | 0      |       | ↓ |           |           |           |
| Proteobacteria    | Sutterellaceae                        | <i>Sutterella</i>         |                           | 0.0003 | CENT- CTLs | 0.0068 | 16.32 | ↓ | 0.43±1.17 | 0.46±1.43 | 0.80±0.84 |
|                   |                                       |                           |                           |        | NON- CTLs  | 0.0015 |       | ↓ |           |           |           |
| Proteobacteria    | Desulfovibrionaceae                   | <i>Desulfovibrio</i>      | <i>D. piger</i>           | 0.0004 | CENT- CTLs | 0.0093 | 15.42 | ↑ | 0.14±0.36 | 0.20±0.72 | 0.03±0.09 |
|                   |                                       |                           |                           |        | NON- CTLs  | 0.002  |       | ↑ |           |           |           |
| Synergistetes     |                                       |                           |                           | 0.0007 | CENT- CTLs | 0.0024 | 14.54 | ↑ | 0.56±0.95 | 0.28±0.70 | 0.04±0.07 |
|                   |                                       |                           |                           |        | NON- CTLs  | 0.0154 |       | ↑ |           |           |           |

Table shows the GM significant differences in the two classes of LLS compared to CTLs performed by Kruskal-Wallis test on R software v.3.5.2. Pairwise comparison was performed only for significant taxa, followed by Bonferroni correction for multiple comparisons. *p* equal to or less than 0.05 was considered statistically significant. CENT= centenarian subjects, NON= nonagenarian subjects, CTLs= healthy younger controls, ↓= significantly reduced in the first term of the pairwise group, ↑= significantly increased in the first term of the pairwise group.

**Table S5** 24 Statistically significant divergences in the relative abundance of bacterial taxa observed only from the comparison between CENT and CTLs

|                 |                       |                             |                                |                                   | Post-hoc analysis, Bonferroni method |                          |                                      | (only for significant bacteria) |                 |                |                 |
|-----------------|-----------------------|-----------------------------|--------------------------------|-----------------------------------|--------------------------------------|--------------------------|--------------------------------------|---------------------------------|-----------------|----------------|-----------------|
| Phylum          | Family                | Genus                       | Species                        | Kruskal-Wallis<br><i>p</i> -value | Pairwise group                       | Pairwise <i>p</i> -value | Chi square ( <i>χ</i> <sup>2</sup> ) | ↓/↑                             | Mean±SD<br>CENT | Mean±SD<br>NON | Mean±SD<br>CTLs |
| Bacteroidetes   | Rikenellaceae         |                             |                                | 0.0023                            | CENT- CTLs                           | 0.0034                   | 12.17                                | ↑                               | 0.12±0.18       | 0.06±0.11      | 0.07±0.14       |
| Bacteroidetes   | Bacteroidaceae        | <i>Bacteroides</i>          | <i>B. coprocola</i>            | 0.0209                            | CENT- CTLs                           | 0.0333                   | 7.73                                 | ↓                               | 0.64±2.45       | 0.28±0.83      | 0.98±3.70       |
| Bacteroidetes   | Bacteroidaceae        | <i>Bacteroides</i>          | <i>B. ovatus</i>               | 0.0085                            | CENT- CTLs                           | 0.0179                   | 9.54                                 | ↓                               | 0.27±0.51       | 0.44±0.63      | 1.27±2.57       |
| Bacteroidetes   | Bacteroidaceae        | <i>Bacteroides</i>          | <i>B. paurosaccharolyticus</i> | 0.0167                            | CENT- CTLs                           | 0.0176                   | 8.18                                 | ↓                               | 0.10±0.13       | 0.15±0.18      | 0.18±0.17       |
| Bacteroidetes   | Prevotellaceae        | <i>Paraprevotella</i>       | <i>P. clara</i>                | 0.0378                            | CENT- CTLs                           | 0.0453                   | 6.55                                 | ↓                               | 0.04±0.08       | 0.06±0.11      | 0.16±0.28       |
| Firmicutes      | Synergistaceae        |                             |                                | 0                                 | CENT- CTLs                           | 0.0067                   | 30.49                                | ↑                               | 0.48±0.88       | 0.17±0.63      | 0.03±0.13       |
| Firmicutes      | Lachnospiraceae       | <i>Blautia</i>              |                                | 0.0376                            | CENT- CTLs                           | 0.0335                   | 6.56                                 | ↓                               | 3.63±2.36       | 5.48±3.94      | 6.50±4.86       |
| Firmicutes      | Syntrophomonadaceae   | <i>Caldicellulosiruptor</i> |                                | 0.0102                            | CENT- CTLs                           | 0.0148                   | 9.17                                 | ↑                               | 0.11±0.11       | 0.08±0.10      | 0.06±0.07       |
| Firmicutes      | Lachnospiraceae       | <i>Blautia</i>              | <i>B. coccoides</i>            | 0.0072                            | CENT- CTLs                           | 0.0059                   | 9.87                                 | ↓                               | 0.63±0.46       | 1.40±1.31      | 1.40±1.05       |
| Firmicutes      | Erysipelothricaceae   | <i>Erysipelothrix</i>       | <i>E. inopinata</i>            | 0.0317                            | CENT- CTLs                           | 0.0258                   | 6.9                                  | ↓                               | 0.06±0.13       | 0.13±0.29      | 0.16±0.49       |
| Proteobacteria  | Desulfohalobiaceae    |                             |                                | 0.014                             | CENT- CTLs                           | 0.0109                   | 8.53                                 | ↑                               | 0.23±0.27       | 0.11±0.09      | 0.15±0.27       |
| Proteobacteria  | Desulfohalobiaceae    | <i>Desulfonauticus</i>      |                                | 0.0142                            | CENT- CTLs                           | 0.011                    | 8.51                                 | ↑                               | 0.23±0.27       | 0.11±0.09      | 0.15±0.27       |
| Proteobacteria  | Desulfovibrionaceae   | <i>Desulfovibrio</i>        |                                | 0.0079                            | CENT- CTLs                           | 0.0177                   | 9.68                                 | ↑                               | 0.44±0.48       | 0.70±1.66      | 0.19±0.34       |
| Proteobacteria  | Desulfohalobiaceae    | <i>Desulfonauticus</i>      | <i>D. autotrophicus</i>        | 0.0142                            | CENT- CTLs                           | 0.011                    | 8.51                                 | ↑                               | 0.23±0.27       | 0.11±0.09      | 0.15±0.27       |
| Synergistetes   | Synergistaceae        | <i>Cloacibacillus</i>       |                                | 0.0028                            | CENT- CTLs                           | 0.0018                   | 11.77                                | ↑                               | 0.27±0.71       | 0.11±0.57      | 0.02±0.11       |
| Synergistetes   | <i>Synergistaceae</i> | <i>Synergistes</i>          |                                | 0.0191                            | CENT- CTLs                           | 0.0148                   | 7.92                                 | ↑                               | 0.15±0.45       | 0.03±0.09      | 0.01±0.06       |
| Verrucomicrobia |                       |                             |                                | 0.0032                            | CENT- CTLs                           | 0.0036                   | 11.47                                | ↑                               | 10.26±14.88     | 6.46±10.39     | 2.20±4.71       |
| Verrucomicrobia | Verrucomicrobiaceae   |                             |                                | 0.0047                            | CENT- CTLs                           | 0.0054                   | 10.72                                | ↑                               | 10.19±14.84     | 6.43±10.36     | 2.19±4.70       |
| Verrucomicrobia | Verrucomicrobiaceae   | <i>Akkermansia</i>          |                                | 0.0054                            | CENT- CTLs                           | 0.0058                   | 10.45                                | ↑                               | 9.02±13.17      | 5.67±9.17      | 1.91±4.12       |
| Verrucomicrobia | Verrucomicrobiaceae   | <i>Luteolibacter</i>        |                                | 0.001                             | CENT- CTLs                           | 0.0012                   | 13.78                                | ↑                               | 0.49±0.70       | 0.31±0.50      | 0.11±0.24       |
| Verrucomicrobia | Verrucomicrobiaceae   | <i>Prostheco bacter</i>     |                                | 0.0072                            | CENT- CTLs                           | 0.0098                   | 9.86                                 | ↑                               | 0.16±0.22       | 0.10±0.15      | 0.04±0.08       |
| Verrucomicrobia | Rubritaleaceae        | <i>Rubritalea</i>           |                                | 0.0035                            | CENT- CTLs                           | 0.0045                   | 11.29                                | ↑                               | 0.38±0.53       | 0.24±0.39      | 0.09±0.18       |
| Verrucomicrobia | Verrucomicrobiaceae   | <i>Akkermansia</i>          | <i>A. muciniphila</i>          | 0.0054                            | CENT- CTLs                           | 0.0058                   | 10.45                                | ↑                               | 9.02±13.16      | 5.67±9.17      | 1.91±4.12       |
| Verrucomicrobia | Verrucomicrobiaceae   | <i>Luteolibacter</i>        | <i>L. algae</i>                | 0.001                             | CENT- CTLs                           | 0.0012                   | 13.78                                | ↑                               | 0.49±0.70       | 0.31±0.50      | 0.11±0.24       |

Table shows the 24 GM significant differences observed only from the comparison between CENT and CTLs, performed by Kruskal-Wallis test on R software v.3.5.2. Pairwise comparison was performed only for significant taxa, followed by Bonferroni correction for multiple comparisons. *p* equal to or less than 0.05 was considered statistically significant. CENT= centenarian subjects, NON= nonagenarian subjects, CTLs= healthy younger controls, ↓= significantly reduced in CENT, ↑= significantly increased in CENT.

**Table S6 41** Statistically significant divergences in the relative abundance of bacterial taxa observed only from the comparison between NON and CTLs

| Phylum         | Family              | Genus                             | Species                    | Kruskal-Wallis<br><i>p</i> -value | Post-hoc analysis, Bonferroni method<br>(only for significant bacteria) |                             |                               | ↓/↑ | Mean±SD<br>CENT | Mean±SD<br>NON | Mean±SD<br>CTLs |
|----------------|---------------------|-----------------------------------|----------------------------|-----------------------------------|-------------------------------------------------------------------------|-----------------------------|-------------------------------|-----|-----------------|----------------|-----------------|
|                |                     |                                   |                            |                                   | Pairwise<br>group                                                       | Pairwise<br><i>p</i> -value | Chi<br>square<br>( $\chi^2$ ) |     |                 |                |                 |
| Actinobacteria | Bifidobacteriaceae  |                                   |                            | 0.0037                            | NON- CTLs                                                               | 0.0058                      | 11.2                          | ↑   | 6.95±10.25      | 8.01±9.71      | 2.08±3.03       |
| Actinobacteria | Bifidobacteriaceae  | <i>Bifidobacterium</i>            |                            | 0.0039                            | NON- CTLs                                                               | 0.0061                      | 11.1                          | ↑   | 6.91±10.18      | 7.98±9.67      | 2.07±3.02       |
| Actinobacteria | Eggerthellaceae     | <i>Slackia</i>                    |                            | 0.0024                            | NON- CTLs                                                               | 0.0028                      | 12.07                         | ↑   | 0.27±0.29       | 0.29±0.26      | 0.17±0.26       |
| Actinobacteria | Bifidobacteriaceae  | <i>Bifidobacterium</i>            | <i>B. angulatum</i>        | 0                                 | NON- CTLs                                                               | 0                           | 24.71                         | ↑   | 0.01±0.03       | 0.18±0.60      | 0.00±0.01       |
| Actinobacteria | Bifidobacteriaceae  | <i>Bifidobacterium</i>            | <i>B. asteroides</i>       | 0.0006                            | NON- CTLs                                                               | 0.0011                      | 14.95                         | ↑   | 0.11±0.18       | 0.11±0.14      | 0.02±0.03       |
| Actinobacteria | Bifidobacteriaceae  | <i>Bifidobacterium</i>            | <i>B. bifidum</i>          | 0.0175                            | NON- CTLs                                                               | 0.0418                      | 8.09                          | ↑   | 0.29±0.48       | 0.11±0.17      | 0.04±0.17       |
| Actinobacteria | Bifidobacteriaceae  | <i>Bifidobacterium</i>            | <i>B. catenulatum</i>      | 0.0025                            | NON- CTLs                                                               | 0.0031                      | 11.95                         | ↑   | 0.92±3.03       | 1.03±2.04      | 0.12±0.33       |
| Actinobacteria | Bifidobacteriaceae  | <i>Bifidobacterium</i>            | <i>B. choerinum</i>        | 0.0118                            | NON- CTLs                                                               | 0.033                       | 8.88                          | ↑   | 0.14±0.19       | 0.24±0.33      | 0.09±0.19       |
| Actinobacteria | Bifidobacteriaceae  | <i>Bifidobacterium</i>            | <i>B. indicum</i>          | 0.0018                            | NON- CTLs                                                               | 0.0022                      | 12.68                         | ↑   | 0.14±0.25       | 0.23±0.25      | 0.06±0.10       |
| Actinobacteria | Bifidobacteriaceae  | <i>Bifidobacterium</i>            | <i>B. kashiwanohense</i>   | 0.0011                            | NON- CTLs                                                               | 0.0008                      | 13.55                         | ↑   | 0.12±0.34       | 0.16±0.29      | 0.02±0.05       |
| Actinobacteria | Coriobacteriaceae   | <i>Collinsella</i>                | <i>C. aerofaciens</i>      | 0.0122                            | NON- CTLs                                                               | 0.0126                      | 8.82                          | ↑   | 0.36±0.42       | 0.40±0.48      | 0.21±0.41       |
| Actinobacteria | Coriobacteriaceae   | <i>Collinsella</i>                | <i>C. tanakaei</i>         | 0.001                             | NON- CTLs                                                               | 0.0007                      | 13.77                         | ↑   | 0.09±0.34       | 0.29±1.26      | 0.01±0.02       |
| Bacteroidetes  | Bacteroidaceae      | <i>Bacteroides</i>                | <i>B. caccae</i>           | 0.0005                            | NON- CTLs                                                               | 0.0003                      | 15.31                         | ↓   | 0.56±0.76       | 0.27±0.65      | 0.90±1.09       |
| Bacteroidetes  | Bacteroidaceae      | <i>Bacteroides</i>                | <i>B. cellulosilyticus</i> | 0.011                             | NON- CTLs                                                               | 0.0091                      | 9.02                          | ↓   | 0.37±0.74       | 0.19±0.56      | 0.61±1.22       |
| Bacteroidetes  | Bacteroidaceae      | <i>Bacteroides</i>                | <i>B. denticulum</i>       | 0.0154                            | NON- CTLs                                                               | 0.0363                      | 8.35                          | ↓   | 0.13±0.31       | 0.12±0.23      | 0.52±1.20       |
| Bacteroidetes  | Bacteroidaceae      | <i>Bacteroides</i>                | <i>B. fragilis</i>         | 0.0172                            | NON- CTLs                                                               | 0.0316                      | 8.13                          | ↑   | 0.22±0.30       | 0.68±1.54      | 0.24±0.71       |
| Bacteroidetes  | Bacteroidaceae      | <i>Bacteroides</i>                | <i>B. stercorisoris</i>    | 0                                 | NON- CTLs                                                               | 0                           | 23.17                         | ↓   | 0.40±0.41       | 0.22±0.24      | 0.62±0.52       |
| Bacteroidetes  | Bacteroidaceae      | <i>Bacteroides</i>                | <i>B. uniformis</i>        | 0.0043                            | NON- CTLs                                                               | 0.0042                      | 10.89                         | ↓   | 3.05±5.92       | 1.43±2.30      | 3.09±3.36       |
| Bacteroidetes  | Sphingobacteriaceae | <i>Sphingobacterium</i>           | <i>S. shayense</i>         | 0.0389                            | NON- CTLs                                                               | 0.0421                      | 4.49                          | ↓   | 0.09±0.10       | 0.08±0.10      | 0.18±0.27       |
| Chloroflexi    | Caldiineaceae       |                                   |                            | 0.0288                            | NON- CTLs                                                               | 0.0267                      | 7.09                          | ↓   | 0.06±0.04       | 0.05±0.06      | 0.12±0.13       |
| Cyanobacteria  |                     |                                   |                            | 0.0093                            | NON- CTLs                                                               | 0.0071                      | 9.36                          | ↓   | 0.62±0.81       | 0.31±0.45      | 0.95±1.63       |
| Firmicutes     | Eubacteriaceae      |                                   |                            | 0.0179                            | NON- CTLs                                                               | 0.0445                      | 8.05                          | ↑   | 0.13±0.10       | 0.14±0.12      | 0.09±0.08       |
| Firmicutes     | Lactobacillaceae    |                                   |                            | 0.009                             | NON- CTLs                                                               | 0.0235                      | 9.43                          | ↑   | 0.23±0.47       | 1.04±3.22      | 0.13±0.17       |
| Firmicutes     | Streptococcaceae    |                                   |                            | 0                                 | NON- CTLs                                                               | 0                           | 23.55                         | ↑   | 0.72±0.87       | 1.80±2.18      | 0.19±0.26       |
| Firmicutes     | Acidaminococcaceae  | <i>Acidaminococcus</i>            |                            | 0.0084                            | NON- CTLs                                                               | 0.006                       | 9.56                          | ↓   | 0.36±1.22       | 0.04±0.13      | 0.54±1.64       |
| Firmicutes     | Lactobacillaceae    | <i>Lactobacillus</i>              |                            | 0.0064                            | NON- CTLs                                                               | 0.0174                      | 10.12                         | ↑   | 0.22±0.46       | 1.00±3.09      | 0.12±0.16       |
| Firmicutes     | Acidaminococcaceae  | <i>Phascolarctobacterium</i>      |                            | 0.0197                            | NON- CTLs                                                               | 0.0393                      | 7.85                          | ↓   | 1.84±2.79       | 0.29±0.44      | 1.35±2.00       |
| Firmicutes     | Streptococcaceae    | <i>Streptococcus</i>              |                            | 0                                 | NON- CTLs                                                               | 0                           | 23.67                         | ↑   | 0.70±0.87       | 1.78±2.16      | 0.19±0.25       |
| Firmicutes     | Acidaminococcaceae  | <i>Acidaminococcus</i>            | <i>A. intestini</i>        | 0.001                             | NON- CTLs                                                               | 0.0009                      | 13.81                         | ↓   | 0.02±0.06       | 0.00±0.00      | 0.14±0.42       |
| Firmicutes     | Acidaminococcaceae  | <i>Phascolarctobacterium</i>      | <i>P. faecium</i>          | 0.0048                            | NON- CTLs                                                               | 0.0252                      | 10.67                         | ↓   | 0.68±1.10       | 0.04±0.12      | 0.45±1.03       |
| Firmicutes     | Streptococcaceae    | <i>Streptococcus</i>              | <i>S. bovis</i>            | 0                                 | NON- CTLs                                                               | 0                           | 20.22                         | ↑   | 0.03±0.03       | 0.24±0.55      | 0.03±0.13       |
| Firmicutes     | Streptococcaceae    | <i>Streptococcus</i>              | <i>S. parasanguinis</i>    | 0                                 | NON- CTLs                                                               | 0                           | 24.27                         | ↑   | 0.05±0.08       | 0.19±0.30      | 0.01±0.01       |
| Firmicutes     | Streptococcaceae    | <i>Streptococcus</i>              | <i>S. vestibularis</i>     | 0.0066                            | NON- CTLs                                                               | 0.0046                      | 10.05                         | ↑   | 0.18±0.31       | 0.57±0.89      | 0.05±0.10       |
| Firmicutes     | Veillonellaceae     | <i>Veillonella</i>                | <i>V. atypica</i>          | 0.0122                            | NON- CTLs                                                               | 0.0091                      | 8.82                          | ↑   | 0.05±0.14       | 0.12±0.22      | 0.04±0.11       |
| Firmicutes     | Veillonellaceae     | <i>Veillonella</i>                | <i>V. dispar</i>           | 0.0195                            | NON- CTLs                                                               | 0.0155                      | 7.87                          | ↑   | 0.05±0.18       | 0.11±0.28      | 0.02±0.04       |
| Proteobacteria | Enterobacteriaceae  | <i>Enterobacter</i>               |                            | 0.0246                            | NON- CTLs                                                               | 0.0201                      | 7.41                          | ↑   | 0.34±0.67       | 0.76±2.35      | 0.11±0.35       |
| Proteobacteria | Enterobacteriaceae  | <i>Escherichia</i>                |                            | 0.0022                            | NON- CTLs                                                               | 0.0019                      | 12.28                         | ↑   | 7.00±12.18      | 3.14±6.70      | 0.22±0.65       |
| Proteobacteria | Yersiniaceae        | <i>Serratia</i>                   |                            | 0.0007                            | NON- CTLs                                                               | 0.0005                      | 14.56                         | ↑   | 1.15±1.92       | 0.67±1.10      | 0.06±0.13       |
| Proteobacteria | Zoogloeaceae        | <i>Uliginosibacterium</i>         |                            | 0.0327                            | NON- CTLs                                                               | 0.0356                      | 6.84                          | ↓   | 0.02±0.07       | 0.00±0.00      | 0.20±1.25       |
| Proteobacteria | Enterobacteriaceae  | <i>Candidatus<br/>Blochmannia</i> | <i>C. B. rufipes</i>       | 0.0118                            | NON- CTLs                                                               | 0.0123                      | 8.89                          | ↓   | 0.00±0.00       | 0.00±0.00      | 0.65±0.76       |
| Proteobacteria | Enterobacteriaceae  | <i>Escherichia</i>                | <i>E. albertii</i>         | 0.004                             | NON- CTLs                                                               | 0.0037                      | 11.06                         | ↑   | 5.67±9.94       | 2.54±5.38      | 0.20±0.60       |
| Proteobacteria | Yersiniaceae        | <i>Serratia</i>                   | <i>S. entomophila</i>      | 0.0009                            | NON- CTLs                                                               | 0.0007                      | 14.12                         | ↑   | 1.13±1.90       | 0.66±1.09      | 0.06±0.13       |

Table shows the 41 GM significant differences observed only from the comparison between NON and CTLs, performed by Kruskal-Wallis test on R software v.3.5.2. Pairwise comparison was performed only for significant taxa, followed by Bonferroni correction for multiple comparisons. *p* equal to or less than 0.05 was considered statistically significant. CENT= centenarian subjects, NON= nonagenarian subjects, CTLs= healthy younger controls, ↓= significantly reduced in NON, ↑= significantly increased in NON.

**Table S7** 8 Statistically significant divergences in the relative abundance of bacterial taxa observed from the comparison between CENT and NON

| Phylum         | Family             | Genus                        | Species                | Kruskal-Wallis<br><i>p</i> -value | Post-hoc analysis, Bonferroni method<br>(only for significant bacteria) |                             |                               | ↓/↑ | Mean±SD<br>CENT | Mean±SD<br>NON | Mean±SD<br>CTLs |
|----------------|--------------------|------------------------------|------------------------|-----------------------------------|-------------------------------------------------------------------------|-----------------------------|-------------------------------|-----|-----------------|----------------|-----------------|
|                |                    |                              |                        |                                   | Pairwise<br>group                                                       | Pairwise<br><i>p</i> -value | Chi<br>square<br>( $\chi^2$ ) |     |                 |                |                 |
| Actinobacteria | Bifidobacteriaceae | <i>Bifidobacterium</i>       | <i>B. angulatum</i>    | 0                                 | CENT- NON                                                               | 0.0035                      | 24.71                         | ↓   | 0.01±0.03       | 0.18±0.60      | 0.00±0.01       |
| Actinobacteria | Bifidobacteriaceae | <i>Bifidobacterium</i>       | <i>B. catenulatum</i>  | 0.0025                            | CENT- NON                                                               | 0.0347                      | 11.95                         | ↓   | 0.92±3.03       | 1.03±2.04      | 0.12±0.33       |
| Bacteroidetes  | Bacteroidaceae     | <i>Bacteroides</i>           | <i>B. intestinalis</i> | 0.0184                            | CENT- NON                                                               | 0.0202                      | 7.99                          | ↑   | 0.22±0.53       | 0.00±0.01      | 0.11±0.54       |
| Firmicutes     | Lactobacillaceae   |                              |                        | 0.009                             | CENT- NON                                                               | 0.0267                      | 9.43                          | ↓   | 0.23±0.47       | 1.04±3.22      | 0.13±0.17       |
| Firmicutes     | Eubacteriaceae     | <i>Eubacterium</i>           |                        | 0.0296                            | CENT- NON                                                               | 0.0283                      | 7.04                          | ↓   | 0.13±0.21       | 0.30±0.82      | 0.05±0.10       |
| Firmicutes     | Lactobacillaceae   | <i>Lactobacillus</i>         |                        | 0.0064                            | CENT- NON                                                               | 0.0204                      | 10.12                         | ↓   | 0.22±0.46       | 1.00±3.09      | 0.12±0.16       |
| Firmicutes     | Lachnospiraceae    | <i>Blautia</i>               | <i>B. coccoides</i>    | 0.0072                            | CENT- NON                                                               | 0.0375                      | 9.87                          | ↓   | 0.63±0.46       | 1.40±1.31      | 1.40±1.05       |
| Firmicutes     | Acidaminococcaceae | <i>Phascolarctobacterium</i> | <i>P. faecium</i>      | 0.0048                            | CENT- NON                                                               | 0.0095                      | 10.67                         | ↑   | 0.68±1.10       | 0.04±0.12      | 0.45±1.03       |

Table shows the 8 GM significant differences observed from the comparison between CENT and NON, performed by Kruskal-Wallis test on R software v.3.5.2. Pairwise comparison was performed only for significant taxa, followed by Bonferroni correction for multiple comparisons. *p* equal to or less than 0.05 was considered statistically significant. CENT= centenarian subjects, NON= nonagenarian subjects, CTLs= healthy younger controls, ↓= significantly reduced in CENT, ↑= significantly increased in CENT.

**Table S8** Spearman's correlation between significant taxa and dietary, lifestyle, and clinical parameters in CENT

| Phylum         | Family              | Genus                     | Species                 | Variable                   | R      | <i>p</i> -value |
|----------------|---------------------|---------------------------|-------------------------|----------------------------|--------|-----------------|
| Fusobacteria   |                     |                           |                         | Age                        | 0.612  | 0.009           |
| Fusobacteria   | Fusobacteriaceae    |                           |                         | Age                        | 0.659  | 0.004           |
| Bacteroidetes  | Bacteroidaceae      | <i>Bacteroides</i>        | <i>B. coprocola</i>     | Age                        | -0.489 | 0.046           |
| Cyanobacteria  |                     |                           |                         | BMI                        | 0.581  | 0.018           |
| Cyanobacteria  | Nostocaceae         |                           |                         | BMI                        | 0.54   | 0.031           |
| Proteobacteria | Zoogloeaceae        | <i>Uliginosibacterium</i> |                         | BMI                        | -0.503 | 0.047           |
| Bacteroidetes  | Prevotellaceae      | <i>Prevotella</i>         | <i>P. shahii</i>        | BMI                        | -0.56  | 0.024           |
| Firmicutes     | Erysipelothricaceae | <i>Erysipelothrix</i>     | <i>E. inopinata</i>     | Alcohol_consumption        | 0.495  | 0.043           |
| Firmicutes     | Thermicanaceae      |                           |                         | Alcohol_consumption        | 0.529  | 0.029           |
| Firmicutes     | Thermicanaceae      | <i>Thermicanus</i>        |                         | Alcohol_consumption        | 0.529  | 0.029           |
| Firmicutes     | Thermicanaceae      | <i>Thermicanus</i>        |                         | Former_Alcohol_consumption | 0.505  | 0.039           |
| Firmicutes     | Thermicanaceae      | <i>Thermicanus</i>        |                         | Former_Alcohol_consumption | 0.505  | 0.039           |
| Proteobacteria | Desulfovibrionaceae | <i>Desulfovibrio</i>      |                         | Former_Alcohol_consumption | -0.515 | 0.034           |
| Actinobacteria | Eggerthellaceae     | <i>Eggerthella</i>        |                         | Coffee_consumption         | 0.596  | 0.012           |
| Euryarchaeota  |                     |                           |                         | Coffee_consumption         | 0.488  | 0.047           |
| Euryarchaeota  | Methanobacteriaceae |                           |                         | Coffee_consumption         | 0.488  | 0.047           |
| Euryarchaeota  | Methanobacteriaceae | <i>Methanobrevibacter</i> |                         | Coffee_consumption         | 0.488  | 0.047           |
| Euryarchaeota  | Methanobacteriaceae | <i>Methanobrevibacter</i> | <i>M. smithii</i>       | Coffee_consumption         | 0.488  | 0.047           |
| Firmicutes     | Erysipelothricaceae | <i>Erysipelothrix</i>     | <i>E. inopinata</i>     | Bowel_function             | 0.5    | 0.041           |
| Firmicutes     | Lactobacillaceae    | <i>Lactobacillus</i>      | <i>L. taiwanensis</i>   | Bowel_function             | -0.645 | 0.005           |
| Firmicutes     | Thermicanaceae      |                           |                         | Bowel_function             | 0.506  | 0.038           |
| Firmicutes     | Thermicanaceae      | <i>Thermicanus</i>        |                         | Bowel_function             | 0.506  | 0.038           |
| Proteobacteria | Desulfohalobiaceae  |                           |                         | Bowel_function             | 0.652  | 0.005           |
| Proteobacteria | Desulfohalobiaceae  | <i>Desulfonauticus</i>    |                         | Bowel_function             | 0.652  | 0.005           |
| Proteobacteria | Desulfohalobiaceae  | <i>Desulfonauticus</i>    | <i>D. autotrophicus</i> | Bowel_function             | 0.652  | 0.005           |
| Synergistetes  |                     |                           |                         | Bowel_function             | 0.571  | 0.017           |
| Synergistetes  | Synergistaceae      |                           |                         | Bowel_function             | 0.563  | 0.019           |
| Firmicutes     | Coprobaillaceae     |                           |                         | Number_medications         | -0.542 | 0.025           |
| Synergistetes  | Synergistaceae      | <i>Cloacibacillus</i>     |                         | Number_medications         | -0.483 | 0.05            |
| Actinobacteria | Bifidobacteriaceae  | <i>Bifidobacterium</i>    | <i>B. angulatum</i>     | Number_medications         | 0.573  | 0.016           |

|                |                       |                          |                       |                    |        |       |
|----------------|-----------------------|--------------------------|-----------------------|--------------------|--------|-------|
| Actinobacteria | Coriobacteriaceae     | <i>Collinsella</i>       | <i>C. aerofaciens</i> | Number_medications | -0.587 | 0.013 |
| Firmicutes     | Streptococcaceae      |                          |                       | ADL_score          | -0.534 | 0.027 |
| Proteobacteria | Desulfovibrionaceae   | <i>Desulfovibrio</i>     | <i>D. piger</i>       | ADL_score          | -0.626 | 0.007 |
| Actinobacteria | Eggerthellaceae       | <i>Eggerthella</i>       |                       | DMS_score          | 0.536  | 0.027 |
| Bacteroidetes  | Bacteroidaceae        | <i>Bacteroides</i>       | <i>B. rodentium</i>   | DMS_score          | -0.516 | 0.034 |
| Bacteroidetes  | Tannerellaceae        | <i>Parabacteroides</i>   | <i>P. merdae</i>      | DMS_score          | -0.778 | <.001 |
| Firmicutes     | Lactobacillaceae      | <i>Lactobacillus</i>     | <i>L. taiwanensis</i> | DMS_score          | -0.671 | 0.003 |
| Firmicutes     | Clostridiaceae        |                          |                       | DMS_score          | 0.565  | 0.018 |
| Firmicutes     | Clostridiaceae        | <i>Clostridium</i>       |                       | DMS_score          | 0.593  | 0.012 |
| Firmicutes     | Clostridiaceae        | <i>Dorea</i>             |                       | DMS_score          | 0.494  | 0.044 |
| Firmicutes     | Peptostreptococcaceae | <i>Peptoniphilus</i>     |                       | DMS_score          | 0.591  | 0.012 |
| Firmicutes     | Thermicaceae          |                          |                       | DMS_score          | 0.548  | 0.023 |
| Firmicutes     | Thermicaceae          | <i>Thermicanus</i>       |                       | DMS_score          | 0.548  | 0.023 |
| Firmicutes     | Erysipelotrichidae    | <i>Catenibacterium</i>   |                       | DMS_score          | -0.544 | 0.024 |
| Firmicutes     | Acidaminococcaceae    | <i>Veillonella</i>       |                       | DMS_score          | -0.482 | 0.05  |
| Firmicutes     | Acidaminococcaceae    | <i>Dialister invisus</i> |                       | DMS_score          | -0.484 | 0.049 |
| Proteobacteria | Desulfovibrionaceae   | <i>Desulfovibrio</i>     |                       | MMSE_score         | -0.552 | 0.033 |
| Proteobacteria | Desulfovibrionaceae   | <i>Desulfovibrio</i>     |                       | MNA_score          | -0.665 | 0.004 |
| Proteobacteria | Desulfovibrionaceae   | <i>Desulfovibrio</i>     | <i>D. piger</i>       | MNA_score          | -0.643 | 0.005 |
| Proteobacteria | Desulfovibrionaceae   | <i>Desulfovibrio</i>     | <i>D. piger</i>       | PASE_score         | -0.502 | 0.04  |

Spearman's correlation was calculated in SPSS software v.28.0.1.0. Only significant bacterial taxa identified in the univariate analysis were correlated to clinical parameters. BMI= Body Mass Index, MMSE= Mini Mental State Evaluation, MDS= Mediterranean Diet score, ADL= Activities of Daily Living, PASE= Physical Activity Scale for the Elderly, MNA= Mini Nutritional Assessment. R = r coefficient; *p*-value equal to or less than 0.05 was considered statistically significant.

**Table S9** Spearman's correlation between significant taxa and dietary, lifestyle, and clinical parameters in NON

| Phylum         | Family              | Genus                        | Species                  | Variable                   | R      | <i>p</i> -value |
|----------------|---------------------|------------------------------|--------------------------|----------------------------|--------|-----------------|
| Actinobacteria | Eggerthellaceae     | <i>Slackia</i>               |                          | Age                        | -0.384 | 0.04            |
| Firmicutes     | Streptococcaceae    |                              |                          | BMI                        | 0.548  | 0.01            |
| Firmicutes     | Streptococcaceae    | <i>Streptococcus</i>         |                          | BMI                        | 0.552  | 0.009           |
| Firmicutes     | Streptococcaceae    | <i>Streptococcus</i>         | <i>S. bovis</i>          | BMI                        | 0.571  | 0.007           |
| Actinobacteria | Bifidobacteriaceae  |                              |                          | Alcohol_consumption        | -0.386 | 0.038           |
| Actinobacteria | Bifidobacteriaceae  | <i>Bifidobacterium</i>       |                          | Alcohol_consumption        | -0.396 | 0.033           |
| Actinobacteria | Bifidobacteriaceae  | <i>Bifidobacterium</i>       | <i>B. angulatum</i>      | Alcohol_consumption        | -0.43  | 0.02            |
| Actinobacteria | Bifidobacteriaceae  | <i>Bifidobacterium</i>       | <i>B. catenulatum</i>    | Alcohol_consumption        | -0.431 | 0.02            |
| Actinobacteria | Bifidobacteriaceae  | <i>Bifidobacterium</i>       | <i>B. indicum</i>        | Alcohol_consumption        | -0.425 | 0.022           |
| Actinobacteria | Bifidobacteriaceae  | <i>Bifidobacterium</i>       | <i>B. kashiwanohense</i> | Alcohol_consumption        | -0.396 | 0.033           |
| Actinobacteria | Coriobacteriaceae   |                              |                          | Alcohol_consumption        | -0.51  | 0.005           |
| Actinobacteria | Coriobacteriaceae   | <i>Collinsella</i>           |                          | Alcohol_consumption        | -0.452 | 0.014           |
| Bacteroidetes  | Bacteroidaceae      | <i>Bacteroides</i>           | <i>B. denticanum</i>     | Former_Alcohol_consumption | 0.469  | 0.01            |
| Euryarcheota   |                     |                              |                          | Former_Alcohol_consumption | 0.387  | 0.038           |
| Euryarcheota   | Methanobacteriaceae |                              |                          | Former_Alcohol_consumption | 0.387  | 0.038           |
| Euryarcheota   | Methanobacteriaceae | <i>Methanobrevibacter</i>    |                          | Former_Alcohol_consumption | 0.435  | 0.018           |
| Euryarcheota   | Methanobacteriaceae | <i>Methanobrevibacter</i>    | <i>M. smithii</i>        | Former_Alcohol_consumption | 0.43   | 0.02            |
| Proteobacteria | Xanthomonadaceae    |                              |                          | Former_Alcohol_consumption | -0.463 | 0.011           |
| Bacteroidetes  | Bacteroidaceae      | <i>Bacteroides</i>           | <i>B. uniformis</i>      | Coffe_consumption          | -0.384 | 0.039           |
| Actinobacteria | Bifidobacteriaceae  | <i>Bifidobacterium</i>       | <i>B. angulatum</i>      | Bowel_function             | 0.399  | 0.032           |
| Actinobacteria | Bifidobacteriaceae  | <i>Bifidobacterium</i>       | <i>B. bifidum</i>        | Bowel_function             | 0.41   | 0.027           |
| Euryarcheota   |                     |                              |                          | Bowel_function             | -0.389 | 0.037           |
| Euryarcheota   | Methanobacteriaceae |                              |                          | Bowel_function             | -0.389 | 0.037           |
| Firmicutes     | Acidaminococcaceae  | <i>Phascolarctobacterium</i> | <i>P. faecium</i>        | Bowel_function             | 0.384  | 0.04            |
| Actinobacteria | Bifidobacteriaceae  |                              |                          | Number_medications         | -0.414 | 0.036           |
| Actinobacteria | Bifidobacteriaceae  | <i>Bifidobacterium</i>       |                          | Number_medications         | -0.423 | 0.001           |
| Actinobacteria | Bifidobacteriaceae  | <i>Bifidobacterium</i>       | <i>B. choerinum</i>      | Number_medications         | -0.51  | 0.008           |
| Actinobacteria | Bifidobacteriaceae  | <i>Bifidobacterium</i>       | <i>B. indicum</i>        | Number_medications         | -0.431 | 0.028           |
| Bacteroidetes  |                     |                              |                          | Number_medications         | 0.616  | 0.001           |



|                |                       |                         |                            |                    |        |           |
|----------------|-----------------------|-------------------------|----------------------------|--------------------|--------|-----------|
| Bacteroidetes  | Bacteroidaceae        |                         |                            | Number_medications | -0.414 | 0.036     |
| Bacteroidetes  | Bacteroidaceae        | <i>Bacteroides</i>      |                            | Number_medications | 0.579  | 0.002     |
| Bacteroidetes  | Bacteroidaceae        | <i>Bacteroides</i>      | <i>B. rodentium</i>        | Number_medications | 0.483  | 0.012     |
| Bacteroidetes  | Bacteroidaceae        | <i>Bacteroides</i>      | <i>B. sartorii</i>         | Number_medications | 0.714  | 0.0000422 |
| Bacteroidetes  | Bacteroidaceae        | <i>Bacteroides</i>      | <i>B. uniformis</i>        | Number_medications | 0.468  | 0.016     |
| Firmicutes     | Sphingobacteriaceae   | <i>Sphingobacterium</i> | <i>S. shayense</i>         | Number_medications | 0.442  | 0.024     |
| Firmicutes     | Lachnospiraceae       | <i>Blautia</i>          | <i>B. wexlerae</i>         | Number_medications | -0.446 | 0.022     |
| Proteobacteria | Alcaligenaceae        |                         |                            | Number_medications | 0.47   | 0.015     |
| Proteobacteria | Sutterellaceae        | <i>Sutterella</i>       |                            | Number_medications | 0.47   | 0.015     |
| Proteobacteria | Desulfovibrionaceae   | <i>Desulfovibrio</i>    | <i>D. fairfieldensis</i>   | ADL_score          | -0.399 | 0.032     |
| Proteobacteria | Enterobacteriaceae    | <i>Enterobacter</i>     | <i>E. soli</i>             | ADL_score          | 0.424  | 0.022     |
| Proteobacteria | Enterobacteriaceae    | <i>Escherichia</i>      |                            | ADL_score          | -0.4   | 0.032     |
| Proteobacteria | Enterobacteriaceae    | <i>Escherichia</i>      | <i>E. albertii</i>         | ADL_score          | -0.397 | 0.033     |
| Proteobacteria | Yersiniaceae          | <i>Serratia</i>         |                            | ADL_score          | -0.393 | 0.035     |
| Proteobacteria | Yersiniaceae          | <i>Serratia</i>         | <i>S. entomophila</i>      | ADL_score          | -0.393 | 0.035     |
| Actinobacteria |                       |                         |                            | DMS_score          | -0.46  | 0.012     |
| Actinobacteria | Bifidobacteriaceae    |                         |                            | DMS_score          | -0.466 | 0.011     |
| Actinobacteria | Bifidobacteriaceae    | <i>Bifidobacterium</i>  |                            | DMS_score          | -0.47  | 0.01      |
| Actinobacteria | Bifidobacteriaceae    | <i>Bifidobacterium</i>  | <i>B. adolescentis</i>     | DMS_score          | -0.509 | 0.005     |
| Actinobacteria | Bifidobacteriaceae    | <i>Bifidobacterium</i>  | <i>B. angulatum</i>        | DMS_score          | -0.465 | 0.011     |
| Actinobacteria | Bifidobacteriaceae    | <i>Bifidobacterium</i>  | <i>B. asteroides</i>       | DMS_score          | -0.466 | 0.011     |
| Actinobacteria | Bifidobacteriaceae    | <i>Bifidobacterium</i>  | <i>B. bifidum</i>          | DMS_score          | -0.398 | 0.032     |
| Actinobacteria | Bifidobacteriaceae    | <i>Bifidobacterium</i>  | <i>B. catenulatum</i>      | DMS_score          | -0.405 | 0.029     |
| Actinobacteria | Bifidobacteriaceae    | <i>Bifidobacterium</i>  | <i>B. indicum</i>          | DMS_score          | -0.346 | 0.066     |
| Actinobacteria | Bifidobacteriaceae    | <i>Bifidobacterium</i>  | <i>B. kashiwanohense</i>   | DMS_score          | -0.44  | 0.017     |
| Actinobacteria | Bifidobacteriaceae    | <i>Bifidobacterium</i>  | <i>B. stercoris</i>        | DMS_score          | -0.431 | 0.02      |
| Actinobacteria | Streptomyetaceae      |                         |                            | DMS_score          | -0.406 | 0.029     |
| Bacteroidetes  | Bacteroidaceae        | <i>Bacteroides</i>      | <i>B. clarus</i>           | DMS_score          | -0.431 | 0.02      |
| Bacteroidetes  | Bacteroidaceae        | <i>Bacteroides</i>      | <i>B. dorei</i>            | DMS_score          | 0.568  | 0.001     |
| Bacteroidetes  | Odoribacteraceae      |                         |                            | DMS_score          | 0.376  | 0.044     |
| Bacteroidetes  | Sphingobacteriaceae   | <i>Pedobacter</i>       | <i>P. kwangyangensis</i>   | DMS_score          | 0.387  | 0.038     |
| Bacteroidetes  | Tannerellaceae        | <i>Parabacteroides</i>  | <i>P. goldsteinii</i>      | DMS_score          | 0.399  | 0.032     |
| Bacteroidetes  | Tannerellaceae        | <i>Parabacteroides</i>  | <i>P. johnsonii</i>        | DMS_score          | 0.514  | 0.004     |
| Firmicutes     | Clostridiaceae        | <i>Alkaliphilus</i>     |                            | DMS_score          | 0.415  | 0.025     |
| Firmicutes     | Clostridiaceae        | <i>Clostridium</i>      | <i>C. frigidis</i>         | DMS_score          | 0.374  | 0.045     |
| Firmicutes     | Lactobacillaceae      | <i>Lactobacillus</i>    | <i>L. ultunensis</i>       | DMS_score          | -0.395 | 0.034     |
| Firmicutes     | Peptostreptococcaceae | <i>Peptoniphilus</i>    |                            | DMS_score          | 0.381  | 0.041     |
| Proteobacteria | Desulfovibrionaceae   | <i>Bilophila</i>        |                            | DMS_score          | 0.381  | 0.042     |
| Proteobacteria | Desulfovibrionaceae   | <i>Bilophila</i>        | <i>B. wadsworthia</i>      | DMS_score          | 0.374  | 0.046     |
| Bacteroidetes  |                       |                         |                            | PASE_score         | -0.512 | 0.005     |
| Bacteroidetes  | Bacteroidaceae        | <i>Bacteroides</i>      | <i>B. cellulosilyticus</i> | PASE_score         | -0.388 | 0.038     |
| Bacteroidetes  | Bacteroidaceae        | <i>Bacteroides</i>      | <i>B. uniformis</i>        | PASE_score         | -0.379 | 0.042     |
| Bacteroidetes  | Bacteroidaceae        | <i>Bacteroides</i>      | <i>B. xylanisolvans</i>    | PASE_score         | -0.401 | 0.031     |
| Firmicutes     | Thermicanaceae        |                         |                            | PASE_score         | 0.466  | 0.011     |
| Firmicutes     | Thermicanaceae        | <i>Thermicanus</i>      |                            | PASE_score         | 0.466  | 0.011     |
| Firmicutes     | Lachnospiraceae       | <i>Blautia</i>          | <i>B. wexlerae</i>         | PASE_score         | 0.382  | 0.041     |
| Proteobacteria | Alcaligenaceae        |                         |                            | PASE_score         | -0.384 | 0.04      |
| Proteobacteria | Sutterellaceae        | <i>Sutterella</i>       |                            | PASE_score         | -0.4   | 0.032     |

Spearman's correlation was calculated in SPSS software (v.28.0.1.0). Only significant bacterial taxa identified in the univariate analysis were correlated to clinical parameters. BMI= Body Mass Index, MMSE= Mini Mental State Evaluation, MDS= Mediterranean Diet score, ADL= Activities of Daily Living, PASE= Physical Activity Scale for the Elderly, MNA= Mini Nutritional Assessment. R= r coefficient; *p*-value equal to or less than 0.05 was considered statistically significant.

## References

1. Panagiotakos, D. B., Pitsavos, C., Arvaniti, F., & Stefanadis, C. (2007). Adherence to the Mediterranean food pattern predicts the prevalence of hypertension, hypercholesterolemia, diabetes and obesity, among healthy adults; the accuracy of the MedDietScore. *Preventive medicine*, 44(4), 335–340. <https://doi.org/10.1016/j.ypmed.2006.12.009>
2. Folstein, M. F., Folstein, S. E., & McHugh, P. R. (1975). "Mini-mental state". A practical method for grading the cognitive state of patients for the clinician. *Journal of psychiatric research*, 12(3), 189–198. [https://doi.org/10.1016/0022-3956\(75\)90026-6](https://doi.org/10.1016/0022-3956(75)90026-6)
3. Crum, R. M., Anthony, J. C., Bassett, S. S., & Folstein, M. F. (1993). Population-based norms for the Mini-Mental State Examination by age and educational level. *JAMA*, 269(18), 2386–2391.
4. Katz, S., Downs, T. D., Cash, H. R., & Grotz, R. C. (1970). Progress in development of the index of ADL. *The Gerontologist*, 10(1), 20–30. [https://doi.org/10.1093/geront/10.1\\_part\\_1.20](https://doi.org/10.1093/geront/10.1_part_1.20)
5. Guigoz, Y., Lauque, S., & Vellas, B. J. (2002). Identifying the elderly at risk for malnutrition. The Mini Nutritional Assessment. *Clinics in geriatric medicine*, 18(4), 737–757. [https://doi.org/10.1016/s0749-0690\(02\)00059-9](https://doi.org/10.1016/s0749-0690(02)00059-9)
6. Valentini, A., Federici, M., Cianfarani, M. A., Tarantino, U., & Bertoli, A. (2018). Frailty and nutritional status in older people: the Mini Nutritional Assessment as a screening tool for the identification of frail subjects. *Clinical interventions in aging*, 13, 1237–1244. <https://doi.org/10.2147/CIA.S164174>
7. Washburn, R. A., Smith, K. W., Jette, A. M., & Janney, C. A. (1993). The Physical Activity Scale for the Elderly (PASE): development and evaluation. *Journal of clinical epidemiology*, 46(2), 153–162. [https://doi.org/10.1016/0895-4356\(93\)90053-4](https://doi.org/10.1016/0895-4356(93)90053-4)
